# Supplementary material for: Effect of Estrogen Receptor Status on Circulatory Immune and Metabolomics Profiles of HER2-Positive Breast Cancer Patients Enrolled for Neoadjuvant Targeted Chemotherapy
Source: PubMed Central journal article supplement (PMC7072610; doi:10.3390/cancers12020314), 2020-01-29
Supplement: cancers-12-00314-s001.pdf [file cancers-12-00314-s001.pdf]

## Supplementary Materials

### Contents

**Figure S1.** Comparison between ER(-) and ER(+) BC patients on baseline plasma samples via <sup>1</sup>H NMR metabolomics.

**Figure S2.** Concentration of 10 cytokines in the serum HER2-positive ER(+) and ER(-) BC patients. Mean ± Standard Deviation (SD). n; number of patients for which each cytokine was quantify reported parenthesis. NS; No statistical significantive.

**Figure S3.** Analysis of baseline plasma samples via <sup>1</sup>H NMR metabolomics to compare GR and PR to NATC in ER(+) (A) and ER(-) (B) patients.

**Figure S4.** Comparison between GR and PR subgroups within HER2-positive/ER(+) patients at baseline via <sup>1</sup>H NMR metabolomics.

**Figure S5.** ROC curves of valine (A) and TNF- $\alpha$  (B) diagnostic power to distinguish ER(-) patients who achieve pathological response (GR) from those who achieve only a partial response (PR) to NATC treatment. The ROC curve of the combined linear model VAL+TNF- $\alpha$  (C) shows improved (not relevant) diagnostic power.

**Figure S6.** Baseline <sup>1</sup>H NMR metabolomic profile comparison between patients who developed disease recurrence and those who were found disease free at 10 years.

**Table S1.** Analysis of cytokines in ER(+) patients to discriminate the patients who achieve pathological response (GR) from those who achieve only a partial response (PR) to NATC treatment.

**Table S2.** Analysis of cytokines in ER(-) patients to discriminate the patients who achieve pathological response (GR) from those who achieve only a partial response (PR) to NATC treatment.

**Table S3.** Analysis of cytokines in ER(+) patients to discriminate disease free patients from those who relapsed.

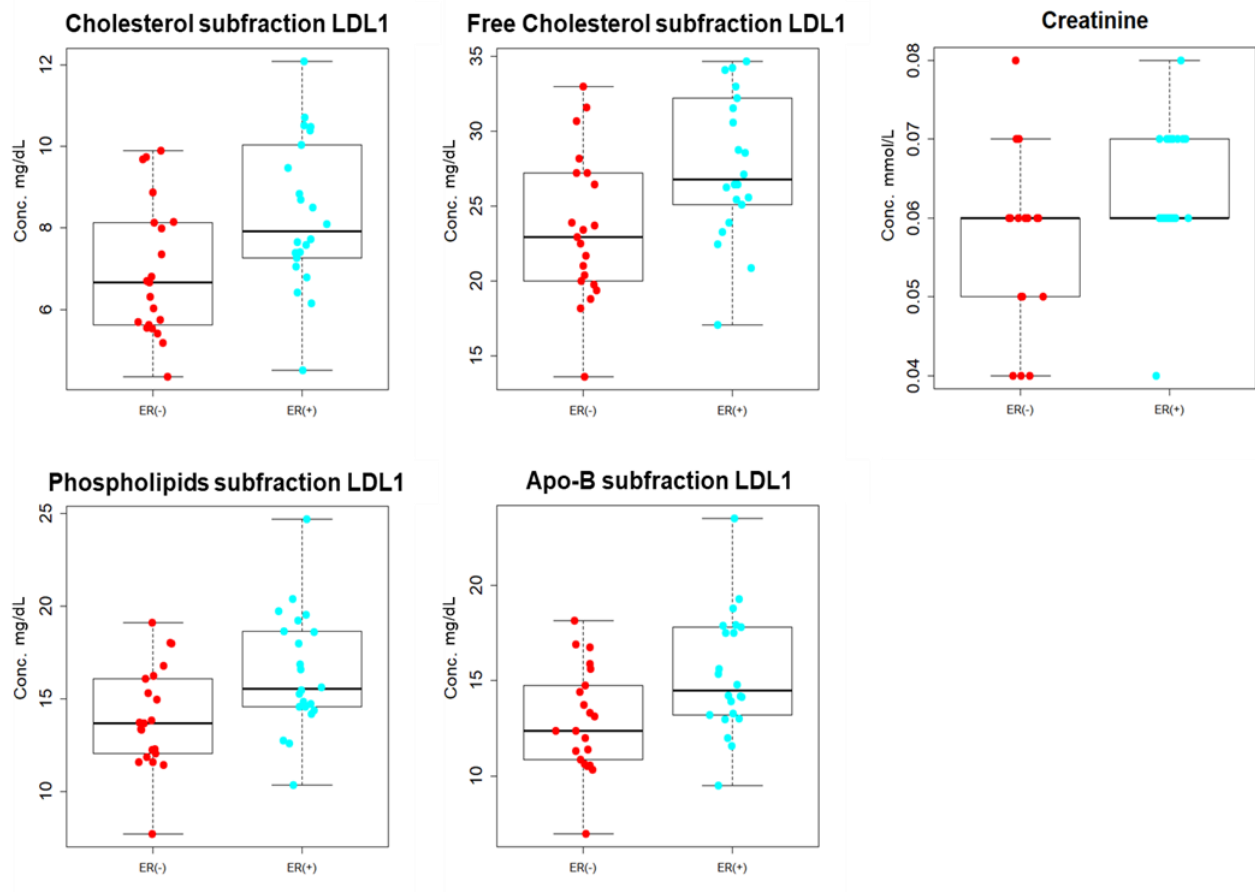

**Figure S1.** Comparison between ER(-) and ER(+) BC patients on baseline plasma samples via <sup>1</sup>H NMR metabolomics. Metabolites and lipid fractions that significantly contribute to the discrimination are reported.

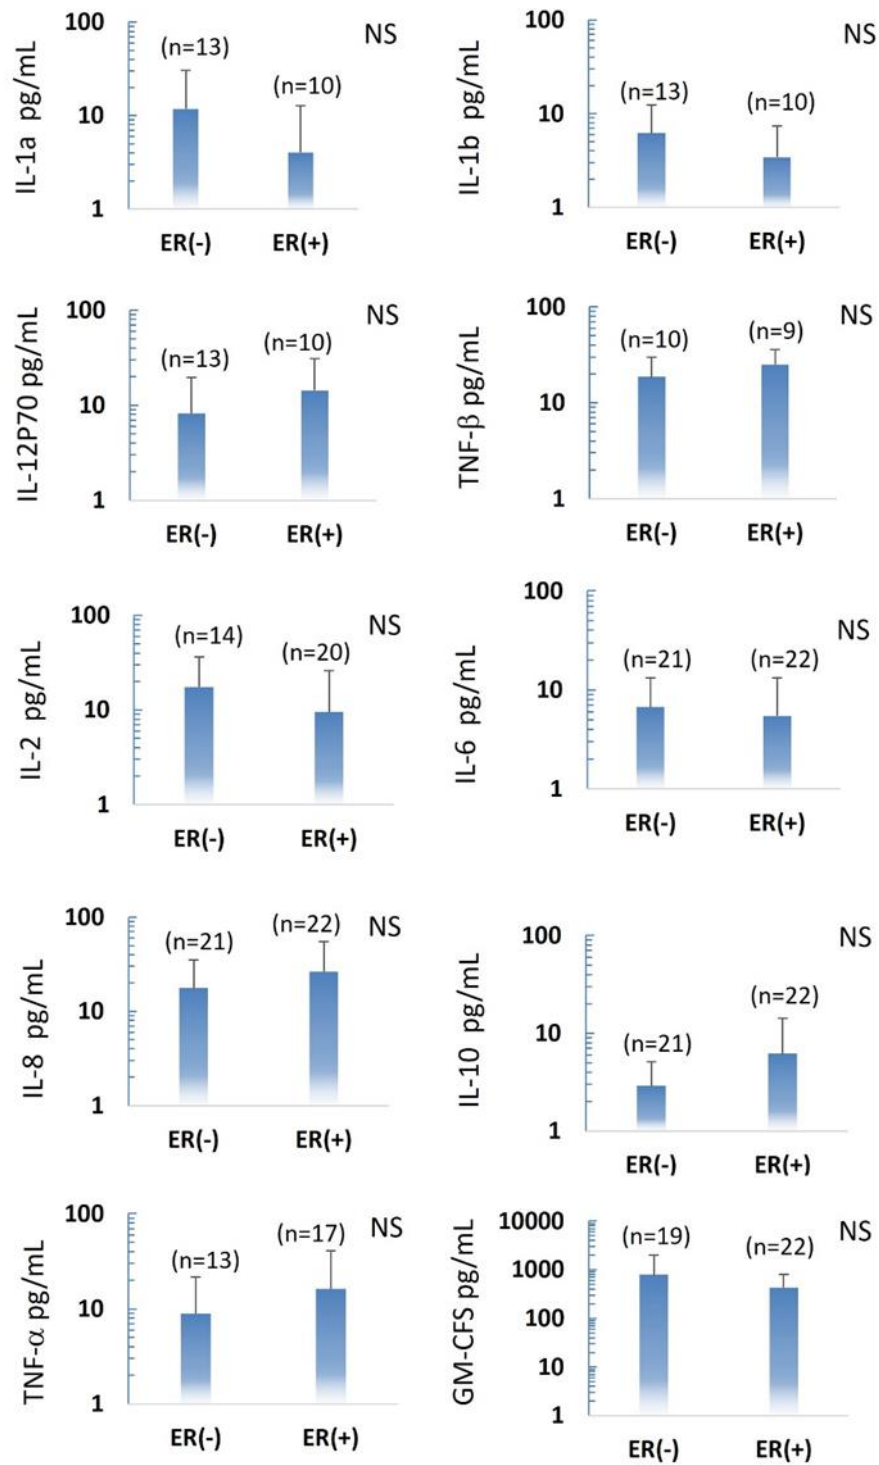

**Figure S2.** Concentration of 10 cytokines in the serum HER2-positive ER(+) and ER(-) BC patients. Mean + Standard Deviation (SD). n: number of patients for which each cytokine was quantify reported parenthesis. NS: No statistical significative.

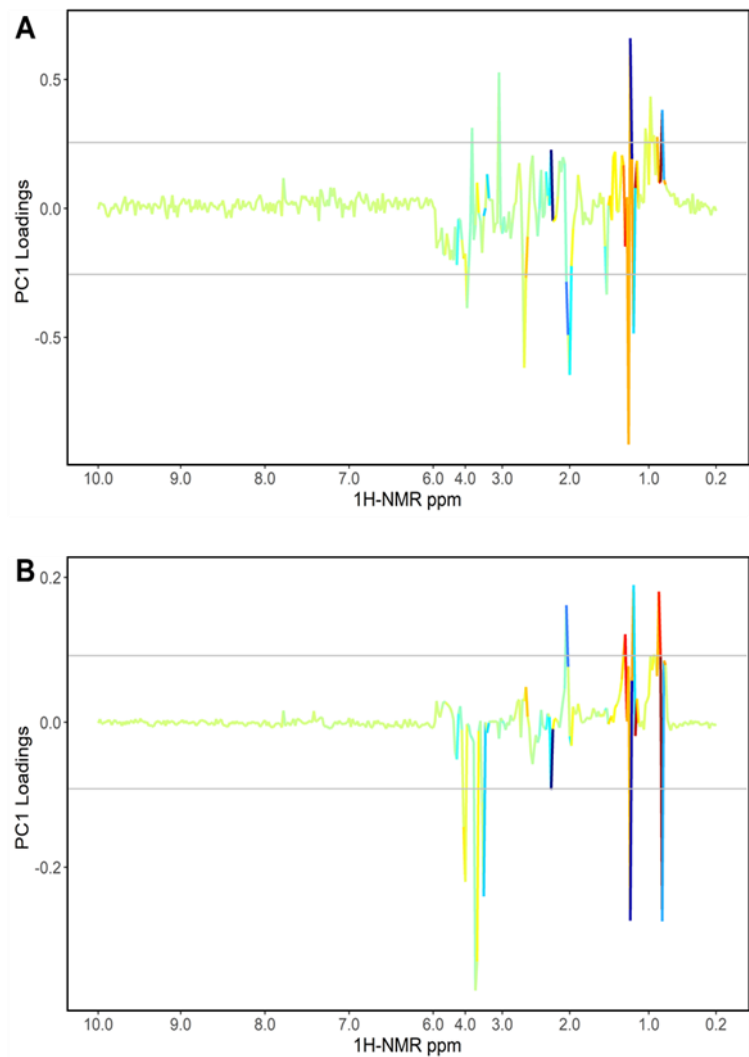

**Figure S3.** Analysis of baseline plasma samples via  $^1\text{H}$  NMR metabolomics to compare GR and PR patients to NATC in ER(+) (A) and ER(-) (B) patients; Loading plots of the first component of the PCA-CA calculated on the CPMG spectra.

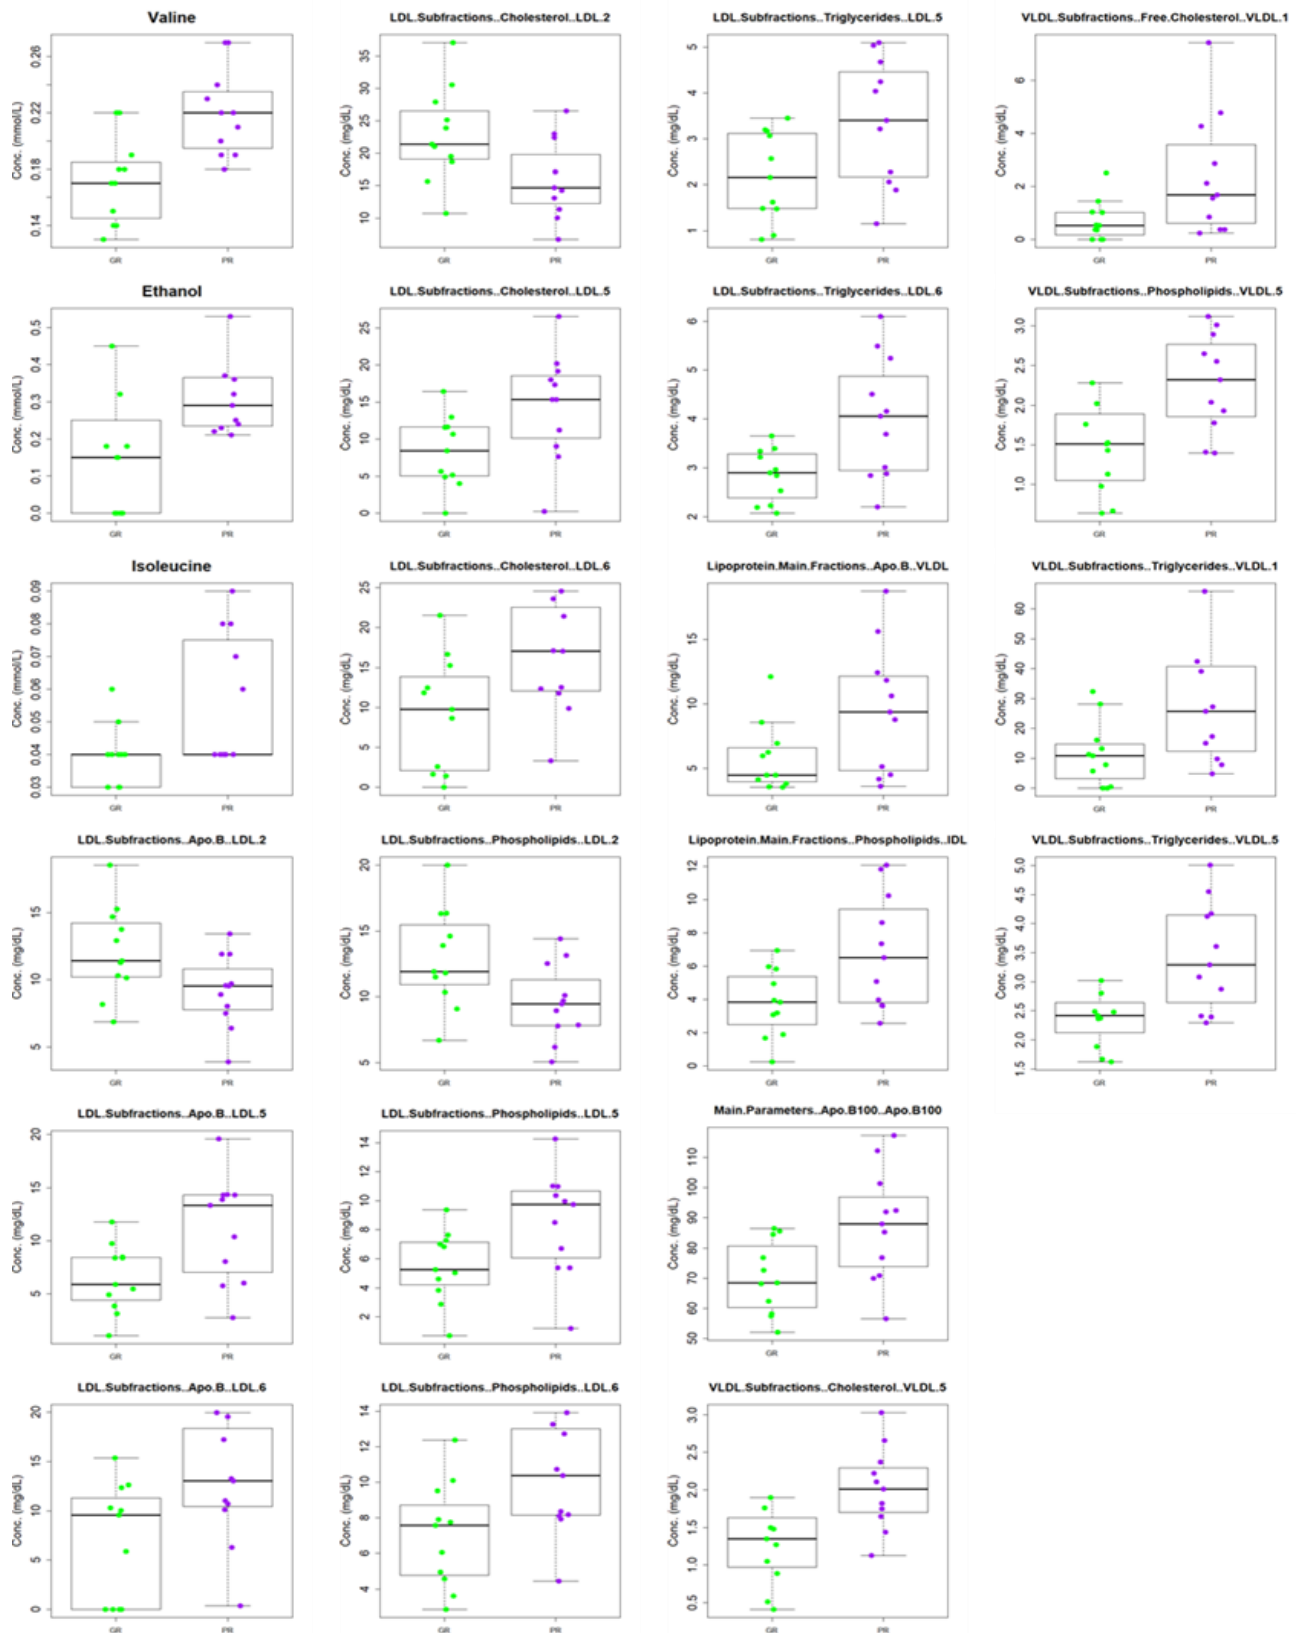

**Figure S4.** Comparison between GR and PR ER(+) patients at baseline via  $^1\text{H}$  NMR metabolomics. Metabolites and lipid fractions that significantly contribute to the discrimination are reported.

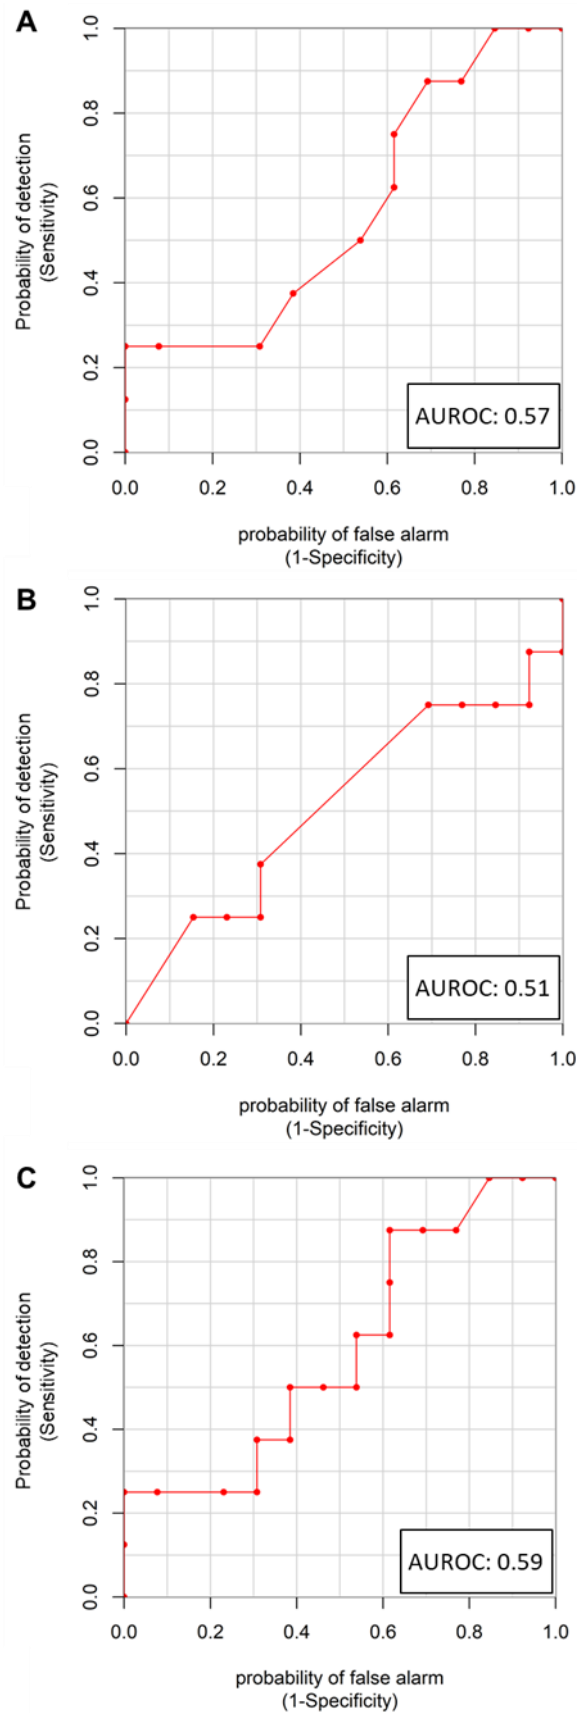

**Figure S5.** ROC curves of valine (A) and TNF- $\alpha$  (B) diagnostic power to distinguish ER(-) patients who achieve pathological response (GR) from those who achieve only a partial response (PR) to NATC treatment. The ROC curve of the combined linear model VAL+TNF- $\alpha$  (C) shows improved (not relevant) diagnostic power.

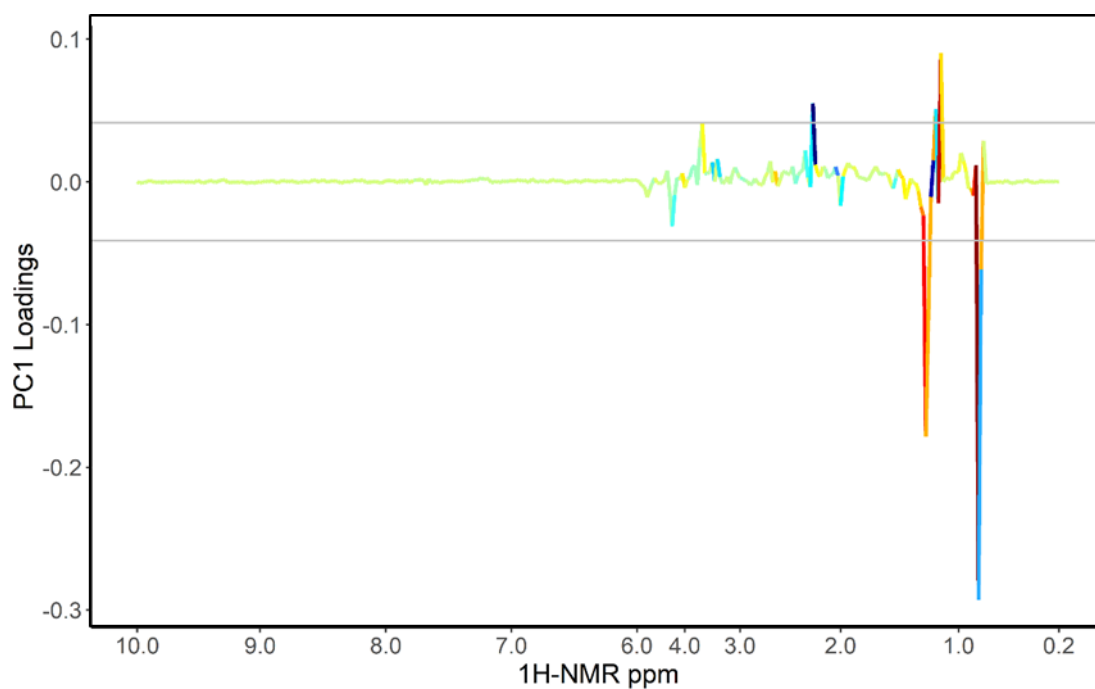

**Figure S6.** Baseline  $^1\text{H}$  NMR metabolomic profile comparison between ER(+) patients who developed disease recurrence and those who were disease free at 10 years. Loading plots of the first component of the PCA-CA calculated on the CPMG spectra.

**Table S1.** Analysis of cytokines in ER(+) patients to discriminate the patients who achieve pathological response (GR) from those who achieve only a partial response (PR) to NATC treatment.

|                                | AUROC | P-value | P-value adjusted with FDR | Cliff's delta effect size |
|--------------------------------|-------|---------|---------------------------|---------------------------|
| <b>IL-2</b>                    | 0.70  | 0.12    | 0.37                      | 0.40                      |
| <b>IL-6</b>                    | 0.52  | 0.90    | 0.90                      | 0.04                      |
| <b>IL-8</b>                    | 0.64  | 0.29    | 0.50                      | -0.27                     |
| <b>IL-10</b>                   | 0.53  | 0.85    | 0.90                      | -0.06                     |
| <b>TNF-<math>\alpha</math></b> | 0.84  | 0.01    | 0.04                      | 0.68                      |
| <b>GM-CSF</b>                  | 0.62  | 0.33    | 0.50                      | 0.23                      |

**Table S2.** Analysis of cytokines in ER(-) patients to discriminate the patients who achieve pathological response (GR) from those who achieve only a partial response (PR) to NATC treatment.

|                                | AUROC | P-value | P-value adjusted with FDR | Cliff's delta effect size |
|--------------------------------|-------|---------|---------------------------|---------------------------|
| <b>IL-2</b>                    | 0.58  | 0.58    | 0.70                      | -0.15                     |
| <b>IL-6</b>                    | 0.61  | 0.46    | 0.68                      | -0.21                     |
| <b>IL-8</b>                    | 0.79  | 0.03    | 0.15                      | 0.58                      |
| <b>IL-10</b>                   | 0.74  | 0.08    | 0.15                      | 0.48                      |
| <b>TNF-<math>\alpha</math></b> | 0.51  | 0.94    | 0.94                      | 0.03                      |
| <b>GM-CSF</b>                  | 0.73  | 0.07    | 0.15                      | -0.46                     |

**Table S3.** Analysis of cytokines in ER(+) patients to discriminate the patients who free from disease and relapsed patients.

|                                | <b>AUROC</b> | <b>P-value</b> | <b>P-value adjusted with FDR</b> | <b>Cliff's deltaeffect size</b> |
|--------------------------------|--------------|----------------|----------------------------------|---------------------------------|
| <b>IL-2</b>                    | 0.77         | 0.04           | 0.12                             | -0.54                           |
| <b>IL-6</b>                    | 0.63         | 0.32           | 0.48                             | -0.27                           |
| <b>IL-8</b>                    | 0.50         | 1.00           | 1.00                             | -0.01                           |
| <b>IL-10</b>                   | 0.79         | 0.03           | 0.12                             | -0.57                           |
| <b>TNF-<math>\alpha</math></b> | 0.56         | 0.65           | 0.79                             | -0.13                           |
| <b>GM-CSF</b>                  | 0.69         | 0.12           | 0.23                             | 0.38                            |
